# Supplementary material for: An Acetamide Derivative as a Camptothecin Sensitizer for Human Non-Small-Cell Lung Cancer Cells through Increased Oxidative Stress and JNK Activation
Source: Oxid Med Cell Longev. 2016 Oct 24;2016:9128102. doi: 10.1155/2016/9128102 (PMC5098095; doi:10.1155/2016/9128102)
Supplement: Supplementary file 1 — 2.10. Assessment of DNA damage. After treatments, cells were fixed in 70% ethanol, washed with PBS, and incubated overnight at 4 ℃ in 1 ml of PBS-T with containing 1% BSA and 0.1 μg anti-γH2AX (Ser139) monoclonal antibody (Cat. SC-101696, Santa Cruz Biotechnology). Cells were re-suspended and incubated in secondary antibody conjugated with Alexa Fluor 488 (Jackson Laboratory, Bar Harbor, ME, USA) and 1 μg/ml of PI. Stainined cells were analyzed using an Accuri C6 flow cytometer (BD Biosciences). [file 9128102.f1.pdf]

## Supplementary Table 1

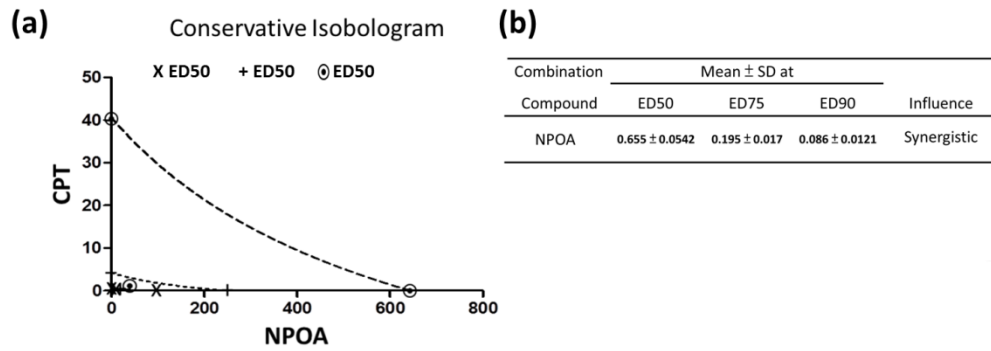

584

585 **Supplementary Table 1:** The synergistic effects of CPT and NPOA combination on  
 586 anti-proliferation of NSCLC cells. H1299 cells were treated with combinations of  
 587 indicated concentrations of CPT and NPOA combination for 48 h respectively. The  
 588 survival rate of H1299 cells was measured using Trypan blue exclusion assay. (a) The  
 589 synergistic effects of CPT and NPOA combination are evaluated using the program  
 590 CalcuSyn and the lines represent the effective doses (EDs) of the effects of the two  
 591 compounds to achieve 50, 75, or 90% inhibition. The dots represent the experimental  
 592 doses used for achieving the above inhibitory effects. (b) The table represents the  
 593 mean values of CI, which represent the degree of CPT and NPOA interactions,  $< 1$   
 594 for synergistic-,  $= 1$  for additive-, and  $> 1$  for antagonistic effects respectively. The  
 595 results are means $\pm$ S.D. from at least three independent experiments.
